# Supplementary material for: Antibacterial, Antidiabetic, and Toxicity Effects of Two Brown Algae: Sargassum buxifolium and Padina gymnospora
Source: MDPI journal article supplement (doi:10.3390/ijpb14010006), 2022-12-30
Supplement: s1 [file s1]

# Supplementary material

## Antibacterial, antidiabetic and toxicity effects of two Brown algae: *Sargassum buxifolium* and *Padina gymnospora*

J. Javier Alvarado-Sansininea <sup>1</sup>, Rosario Tavera-Hernandez<sup>2</sup>, Manuel Jimenez-Estrada<sup>2</sup>, E. Wenceslao Coronado-Aceves<sup>3</sup>, Clara I. Espitia-Pinzón<sup>3</sup>, Sergio Díaz-Martínez<sup>1</sup>, Lisandro Hernández-Anaya<sup>1</sup>, Rosalva Rangel-Corona<sup>4</sup> and Alejandrina Graciela Avila-Ortiz<sup>1,\*</sup>

<sup>1</sup> Herbario FEZA, Facultad de Estudios Superiores Zaragoza, Universidad Nacional Autónoma de México, Batalla de 5 de mayo S/N, Col. Ejército de Oriente, CDMX, 09230, Mexico

<sup>2</sup> Instituto de Química, Universidad Nacional Autónoma de México, Ciudad Universitaria, Coyoacán, 04510, CDMX, Mexico

<sup>3</sup> Instituto de Investigaciones Biomédicas. Universidad Nacional Autónoma de México. CP 04510. CDMX, Mexico

<sup>4</sup> Laboratorio de Oncología Celular, UMIEZ., Facultad de Estudios Superiores Zaragoza, Universidad Nacional Autónoma de México, Batalla de 5 de mayo S/N, Col. Ejército de Oriente, CDMX, 09230, Mexico

\* Correspondence: AGA-O: aviort27@gmail.com

### Content

|                                                                   |   |
|-------------------------------------------------------------------|---|
| FAME analysis <i>S. buxifolium</i> and <i>P. gymnospora</i> ..... | 2 |
| <sup>1</sup> H-NMR spectrum mannitol.....                         | 3 |
| <sup>13</sup> C-NMR spectrum of mannitol .....                    | 4 |
| Toxicity graphics .....                                           | 5 |
| α-glucosidase inhibitory activity graphic .....                   | 5 |
| Toxicity table .....                                              | 6 |

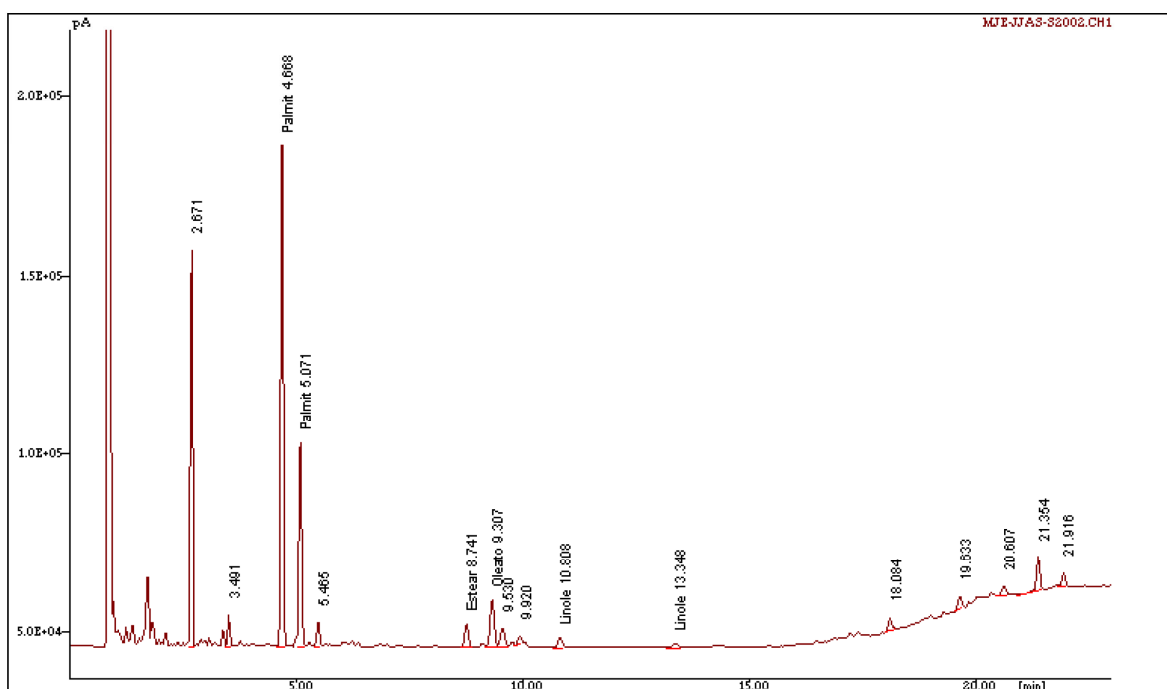

**Figure S1:** Chromatogram, FAMES from hexanic extract of *Sargassum buxifolium*

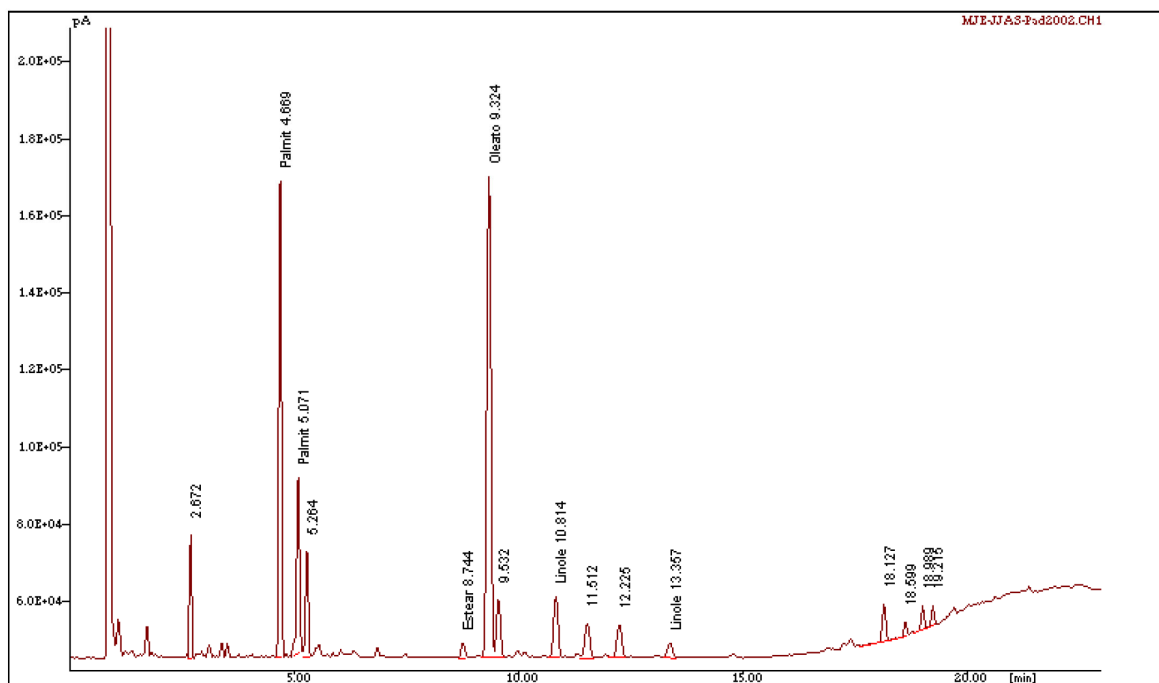

**Figure S2:** Chromatogram, FAMES from hexanic extract of *Padina gymnospora*

5264\_CBustosB\_21.10.fid  
 Instituto de Química, UNAM / C. Bustos  
 Investigador: Dr. Manuel Jiménez  
 No. de registro: 5264  
 Clave: JIAS\_Sol1  
 Disolvente: DMSO-d6  
 1H  
 Bruker Avance III 400 MHz (H)  
 Sonda BBO 400S1 BBF-H-D-05z  
 18-agosto-2021

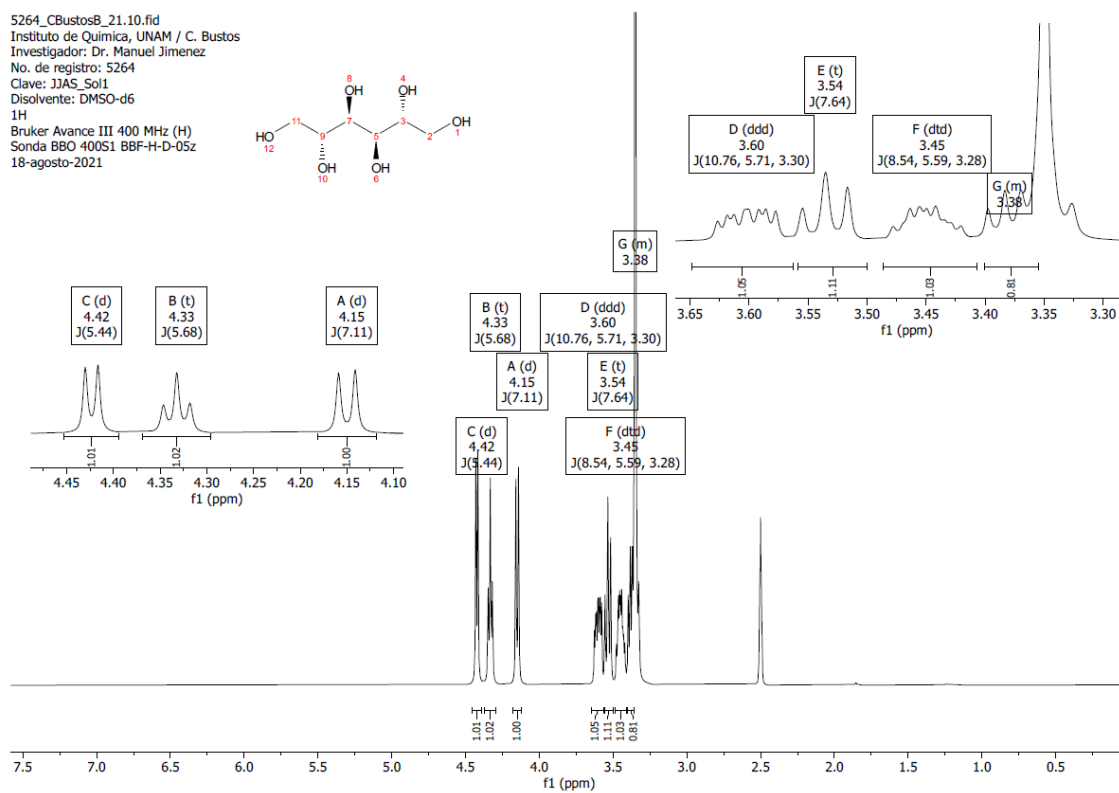

**Figure S3:**  $^1\text{H}$ -NMR spectrum of mannitol (DMSO-d6, 400 MHz).

5264\_CBustosB\_21.11.fid  
Instituto de Química, UNAM / C. Bustos  
Investigador: Dr. Manuel Jimenez  
No. de registro: 5264  
Clave: JJAS\_Sol1  
Disolvente: DMSO-d6  
13C  
Bruker Avance III 400 MHz (H)  
Sonda BBO 400S1 BBF-H-D-05z  
18-agosto-2021

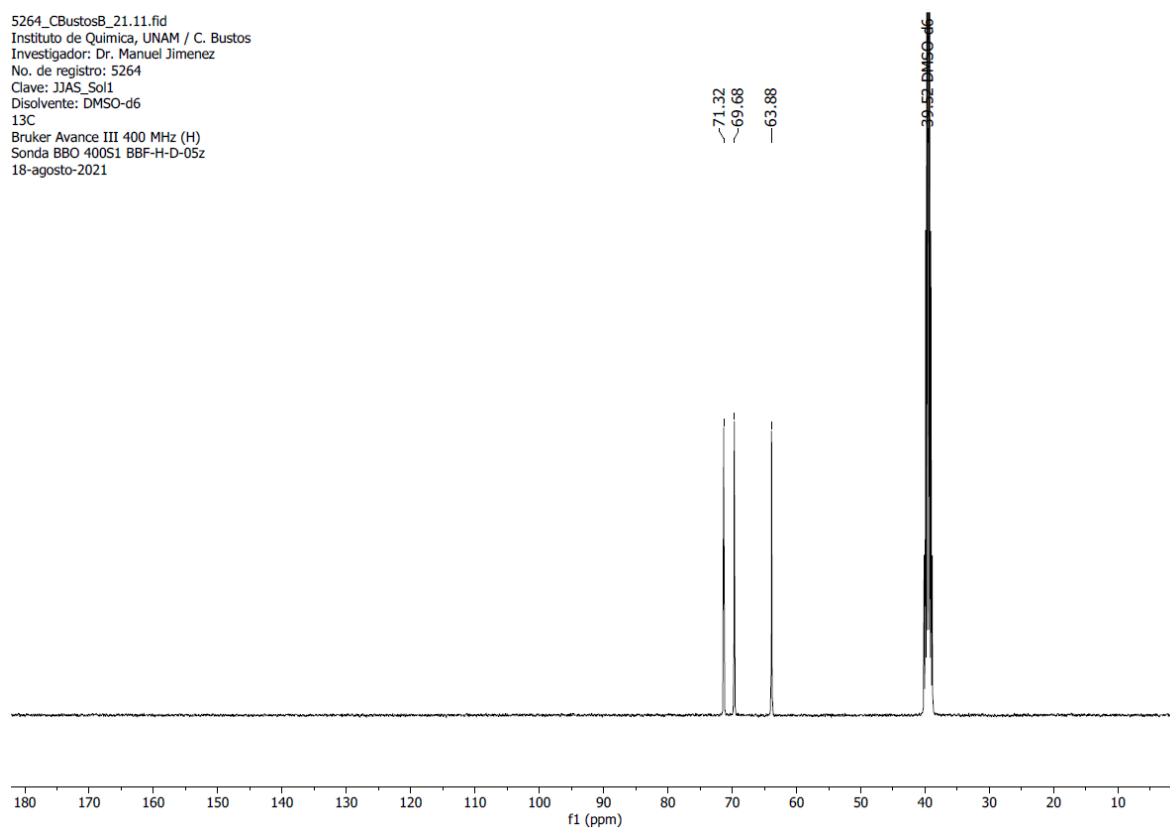

**Figure S4:**  $^{13}\text{C}$ -NMR spectrum of mannitol (DMSO- $d_6$ , 100 MHz)

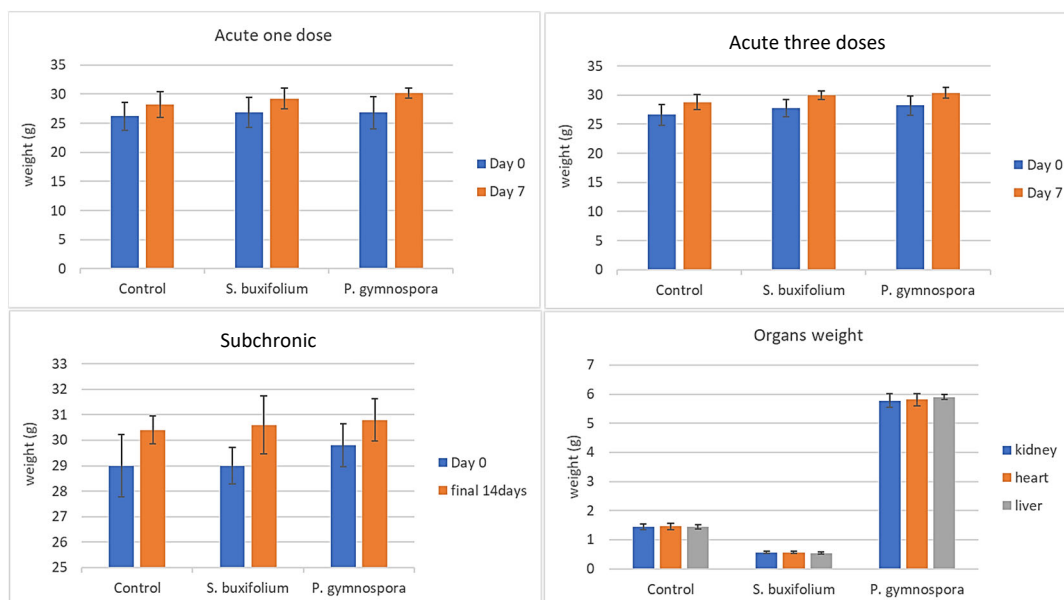

**Figure S5: Toxicity**

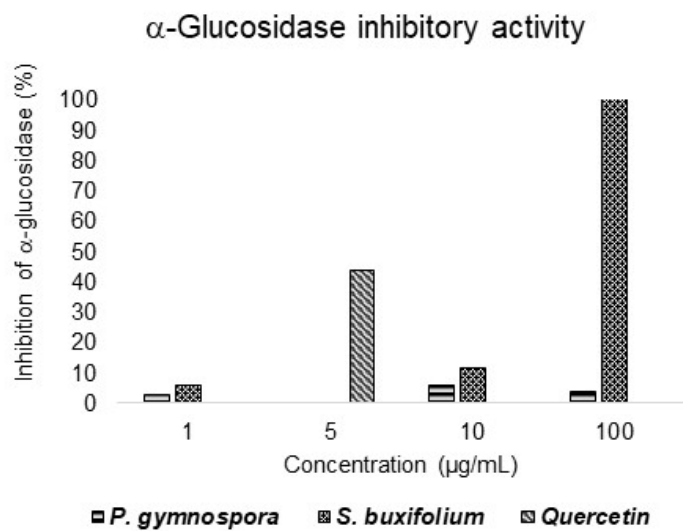

**Figure S6:  $\alpha$ -glucosidase inhibitory activity of hexanic extract of *P. gymnospora* and *S. buxifolium***

**Table S1:** Effect of the acute oral treatment with *S. buxifolium* and *P. gymnospora*.

| Group                | Acute one doses | Acute three doses             | Mice used | Number of mice died (7 days) | Number of mice died (14 days)<br>Subchronic |
|----------------------|-----------------|-------------------------------|-----------|------------------------------|---------------------------------------------|
| Control              | Saline solution | Saline solution               | 5         | 0                            | 0                                           |
| <i>S. buxifolium</i> | 100 mg/kg       | 150 mg/kg (3 of 50mg/kg each) | 5         | 0                            | 0                                           |
| <i>P. gymnospora</i> | 100 mg/kg       | 150 mg/kg (3 of 50mg/kg each) | 5         | 0                            | 0                                           |
